# Supplementary material for: Formation Mechanism of Inter-Crosslink in DNA by Nitrogen Oxides Pollutants through A Diazonium Intermediate
Source: MDPI journal article supplement (doi:10.3390/ijms231810621), 2022-09-13
Supplement: s1 [file s1]

Table S1. Base Step Parameters from the center of the oligonucleotide in the native molecular dynamics.

|       | Shift (Å) | Slide (Å) | Rise (Å) | Tilt (°) | Roll (°) | Twist (°) |
|-------|-----------|-----------|----------|----------|----------|-----------|
| TC/GA | 0.82      | 0.95      | 3.12     | 9.0      | 2.5      | 29.5      |
| CC/GG | 1.20      | 1.10      | 3.77     | 5.0      | 6.5      | 41.0      |
| CG/CG | 1.82      | 0.88      | 2.99     | 3.5      | 9.5      | 24.5      |
| GG/CC | 1.62      | 0.33      | 3.77     | 1.0      | 3.5      | 34.0      |
| GA/TC | 0.40      | 0.07      | 3.26     | 4.0      | 4.0      | 41.0      |
| AT/AT | 0.88      | 0.65      | 3.40     | 6.0      | 5.0      | 23.5      |

Table S2. Base Step Parameters from the center of the oligonucleotide in the diazonium molecular dynamics.

|       | Shift (Å)   | Slide (Å)   | Rise (Å)    | Tilt (°)    | Roll (°) | Twist (°) |
|-------|-------------|-------------|-------------|-------------|----------|-----------|
| TC/GA | 0.68        | 1.55        | 3.69        | 2.0         | 7.5      | 37.0      |
| CC/GG | 0.32        | 1.21        | <b>4.02</b> | 3.0         | 17.5     | 35.0      |
| CG/CD | 1.13        | 1.06        | 3.45        | 7.5         | 19.5     | 16.5      |
| CD/CC | <b>0.63</b> | <b>2.08</b> | <b>4.44</b> | <b>13.0</b> | 3.0      | 33.5      |
| GA/TC | 1.02        | <b>1.37</b> | 3.19        | 4.0         | 4.5      | 32.0      |
| AT/AT | 0.21        | 2.06        | 2.76        | 2.0         | 2.5      | 34.0      |

## Statistics Analysis of Molecular Dynamics Data

RMSD. The root mean square deviation of certain atoms in a molecule with respect to a reference structure can be calculated with the program by least-square fitting the structure to the reference structure ( $t_2 = 0$ ) and subsequently calculating the RMSD [57].

$$RMSD(t_1, t_2) = \left[ \frac{1}{M} \sum_{i=1}^N m_i (\mathbf{r}_i(t_1) - \mathbf{r}_i(t_2))^2 \right]^{1/2}$$

where  $M = \sum_{i=1}^N m_i$  and  $\mathbf{r}_i(t)$  is the position of atom  $i$  at time  $t$ .

RDF. The radial distribution function  $g_{AB}(r)$  between particles of type  $A$  and  $B$  is defined in the following way:

$$g_{AB}(r) = \frac{\langle \rho_B(r) \rangle}{\langle \rho_B \rangle_{local}} = \frac{1}{\langle \rho_B \rangle_{local}} \frac{1}{N_A} \sum_{i \in A} \sum_{j \in B} \frac{\delta(r_{ij} - r)}{4\pi r^2}$$

with  $\langle \rho_B(r) \rangle$  the particle density of type  $B$  at a distance  $r$  around particles  $A$ , and  $\langle \rho_B \rangle_{local}$  the particle density of type  $B$  averaged over all spheres around particles  $A$  with radius  $r_{max}$ . [57].

Propeller Twist Angle. To monitor specific distances between points, the program *gmx distance* can calculate distances as a function of time, as well as the distribution of the distance. The program *gmx angle* calculates the distribution of *angles* and *dihedrals* in time [57].

[57] Apol, E.; Apostolov, R.; Berendsen, H.J.C.; van Buuren, A.; Bjelkmar, P.; van Drunen, R.; Feenstra, A.; Fritsch, S.; Groenhof, G.; Junghans, C.; Hub, J.; Kasson, P.; Kutzner, C.; Lambeth, B.; Larsson, P.; Lemkul, J.A.; Marklund, E.; Meulenhoff, P.; Murtola, T.; Páll, S.; Pronk, S.; Schulz, R.; Shirts, M.; Sijbers, A.; Tieleman, P.; Wennberg, C.; Wolf, M.; Abraham, M.; Hess, B.; van der Spoel, D.; Lindahl, E. Gromacs 2016 Reference Manual.
